# Supplementary material for: Fetal Sylvian Fissure Charts to Evaluate the Development of Fetal Brain using Prenatal MRI
Source: Research Square preprint supplement (doi:10.21203/rs.3.rs-6650795/v1), 2025-06-16
Supplement: Supplementary file 1 [file 95738ba76c8d14d1fedf5144.docx]

Table 1. The 10th, 25th, 50th, 75th and 90thof fetal sylvian fissure measurement for GA in weeks rounded down

|  | | | | BPD | | | | | L-ID | | | | | R-ID | | |
| --- | --- | --- | --- | --- | --- | --- | --- | --- | --- | --- | --- | --- | --- | --- | --- | --- |
| GA | N | C10 | C25 | C50 | C75 | C90 | C10 | C25 | C50 | C75 | C90 | C10 | C25 | C50 | C75 | C90 |
| 22 | 8 | 4.781 | 4.880 | 4.963 | 4.963 | . | 1.142 | 1.173 | 1.200 | 1.200 | . | 1.116 | 1.151 | 1.180 | 1.180 | . |
| 23 | 24 | 5.083 | 5.121 | 5.158 | 5.202 | 5.261 | 1.238 | 1.250 | 1.262 | 1.277 | 1.296 | 1.222 | 1.236 | 1.249 | 1.265 | 1.286 |
| 24 | 21 | 5.377 | 5.421 | 5.493 | 5.521 | 5.550 | 1.335 | 1.350 | 1.374 | 1.384 | 1.393 | 1.329 | 1.345 | 1.371 | 1.382 | 1.392 |
| 25 | 20 | 5.663 | 5.691 | 5.761 | 5.803 | 5.830 | 1.433 | 1.442 | 1.467 | 1.482 | 1.492 | 1.435 | 1.445 | 1.472 | 1.488 | 1.498 |
| 26 | 18 | 5.965 | 5.968 | 6.022 | 6.076 | 6.102 | 1.540 | 1.541 | 1.561 | 1.581 | 1.591 | 1.550 | 1.551 | 1.573 | 1.594 | 1.605 |
| 27 | 19 | 6.209 | 6.262 | 6.314 | 6.366 | 6.366 | 1.631 | 1.651 | 1.671 | 1.691 | 1.691 | 1.647 | 1.668 | 1.689 | 1.711 | 1.711 |
| 28 | 19 | 6.469 | 6.520 | 6.546 | 6.596 | 6.622 | 1.732 | 1.752 | 1.762 | 1.782 | 1.793 | 1.753 | 1.774 | 1.785 | 1.806 | 1.817 |
| 29 | 19 | 6.746 | 6.771 | 6.845 | 6.869 | 6.869 | 1.844 | 1.854 | 1.885 | 1.895 | 1.895 | 1.870 | 1.880 | 1.912 | 1.923 | 1.923 |
| 30 | 25 | 6.990 | 7.014 | 7.061 | 7.085 | 7.109 | 1.946 | 1.957 | 1.977 | 1.988 | 1.998 | 1.976 | 1.987 | 2.008 | 2.018 | 2.029 |
| 31 | 20 | 7.202 | 7.208 | 7.260 | 7.335 | 7.341 | 2.040 | 2.042 | 2.066 | 2.100 | 2.102 | 2.072 | 2.074 | 2.098 | 2.133 | 2.135 |
| 32 | 20 | 7.434 | 7.459 | 7.510 | 7.543 | 7.563 | 2.145 | 2.157 | 2.181 | 2.197 | 2.206 | 2.179 | 2.191 | 2.215 | 2.231 | 2.240 |
| 33 | 20 | 7.675 | 7.675 | 7.697 | 7.761 | 7.783 | 2.260 | 2.260 | 2.271 | 2.303 | 2.314 | 2.294 | 2.294 | 2.305 | 2.337 | 2.347 |
| 34 | 18 | 7.868 | 7.868 | 7.910 | 7.957 | 7.994 | 2.356 | 2.356 | 2.378 | 2.402 | 2.421 | 2.390 | 2.390 | 2.411 | 2.435 | 2.454 |
| 35 | 18 | 8.076 | 8.096 | 8.117 | 8.157 | 8.194 | 2.464 | 2.475 | 2.486 | 2.507 | 2.527 | 2.496 | 2.507 | 2.517 | 2.539 | 2.558 |
| 36 | 20 | 8.278 | 8.278 | 8.297 | 8.356 | 8.376 | 2.573 | 2.573 | 2.583 | 2.616 | 2.627 | 2.602 | 2.602 | 2.613 | 2.645 | 2.655 |
| 37 | 20 | 8.473 | 8.473 | 8.492 | 8.530 | 8.549 | 2.682 | 2.682 | 2.693 | 2.715 | 2.726 | 2.708 | 2.708 | 2.719 | 2.740 | 2.751 |
| 38 | 12 | 8.662 | 8.685 | 8.727 | 8.736 | 8.754 | 2.793 | 2.806 | 2.831 | 2.837 | 2.848 | 2.814 | 2.828 | 2.852 | 2.857 | 2.868 |

|  | | | | AL-SFW | | | | | AR-SFW | | | | | AL-UIL | | |
| --- | --- | --- | --- | --- | --- | --- | --- | --- | --- | --- | --- | --- | --- | --- | --- | --- |
| GA | N | C10 | C25 | C50 | C75 | C90 | C10 | C25 | C50 | C75 | C90 | C10 | C25 | C50 | C75 | C90 |
| 22 | 8 | 0.919 | 0.963 | 1.000 | 1.000 | . | 0.865 | 0.909 | 0.947 | 0.947 | . | 1.421 | 1.440 | 1.455 | 1.455 | . |
| 23 | 24 | 1.055 | 1.072 | 1.089 | 1.109 | 1.137 | 1.001 | 1.018 | 1.035 | 1.056 | 1.083 | 1.476 | 1.482 | 1.488 | 1.495 | 1.503 |
| 24 | 21 | 1.191 | 1.211 | 1.245 | 1.259 | 1.273 | 1.137 | 1.158 | 1.192 | 1.205 | 1.219 | 1.519 | 1.525 | 1.534 | 1.537 | 1.540 |
| 25 | 20 | 1.327 | 1.341 | 1.375 | 1.395 | 1.409 | 1.273 | 1.287 | 1.321 | 1.341 | 1.355 | 1.552 | 1.554 | 1.560 | 1.564 | 1.566 |
| 26 | 18 | 1.476 | 1.477 | 1.504 | 1.531 | 1.545 | 1.421 | 1.423 | 1.450 | 1.477 | 1.491 | 1.574 | 1.574 | 1.577 | 1.579 | 1.580 |
| 27 | 19 | 1.599 | 1.627 | 1.654 | 1.681 | 1.681 | 1.545 | 1.572 | 1.600 | 1.627 | 1.627 | 1.583 | 1.583 | 1.583 | 1.583 | 1.583 |
| 28 | 19 | 1.736 | 1.763 | 1.776 | 1.804 | 1.817 | 1.681 | 1.708 | 1.722 | 1.749 | 1.763 | 1.575 | 1.576 | 1.579 | 1.580 | 1.581 |
| 29 | 19 | 1.885 | 1.899 | 1.940 | 1.953 | 1.953 | 1.831 | 1.844 | 1.885 | 1.899 | 1.899 | 1.555 | 1.555 | 1.558 | 1.565 | 1.567 |
| 30 | 25 | 2.022 | 2.035 | 2.062 | 2.076 | 2.090 | 1.967 | 1.980 | 2.008 | 2.021 | 2.035 | 1.525 | 1.528 | 1.532 | 1.538 | 1.542 |
| 31 | 20 | 2.144 | 2.147 | 2.178 | 2.222 | 2.226 | 2.089 | 2.093 | 2.123 | 2.167 | 2.171 | 1.483 | 1.484 | 1.499 | 1.508 | 1.509 |
| 32 | 20 | 2.282 | 2.297 | 2.328 | 2.348 | 2.361 | 2.226 | 2.242 | 2.273 | 2.293 | 2.305 | 1.430 | 1.435 | 1.444 | 1.456 | 1.462 |
| 33 | 20 | 2.430 | 2.430 | 2.444 | 2.484 | 2.498 | 2.375 | 2.375 | 2.388 | 2.429 | 2.443 | 1.365 | 1.372 | 1.392 | 1.399 | 1.399 |
| 34 | 18 | 2.552 | 2.552 | 2.580 | 2.610 | 2.634 | 2.497 | 2.497 | 2.524 | 2.555 | 2.579 | 1.289 | 1.303 | 1.321 | 1.336 | 1.336 |
| 35 | 18 | 2.689 | 2.702 | 2.716 | 2.743 | 2.768 | 2.633 | 2.647 | 2.660 | 2.687 | 2.712 | 1.204 | 1.221 | 1.239 | 1.247 | 1.256 |
| 36 | 20 | 2.825 | 2.825 | 2.838 | 2.879 | 2.893 | 2.769 | 2.769 | 2.783 | 2.823 | 2.837 | 1.115 | 1.125 | 1.155 | 1.165 | 1.165 |
| 37 | 20 | 2.961 | 2.961 | 2.975 | 3.002 | 3.015 | 2.905 | 2.905 | 2.919 | 2.946 | 2.959 | 1.018 | 1.029 | 1.051 | 1.062 | 1.062 |
| 38 | 12 | 3.097 | 3.114 | 3.145 | 3.151 | 3.165 | 3.041 | 3.058 | 3.089 | 3.095 | 3.109 | 0.887 | 0.899 | 0.905 | 0.933 | 0.948 |

|  | | | | AR-UIL | | | | | AL-UIR | | | | | AR-UIR | | |
| --- | --- | --- | --- | --- | --- | --- | --- | --- | --- | --- | --- | --- | --- | --- | --- | --- |
| GA | N | C10 | C25 | C50 | C75 | C90 | C10 | C25 | C50 | C75 | C90 | C10 | C25 | C50 | C75 | C90 |
| 22 | 8 | 1.435 | 1.449 | 1.460 | 1.460 | . | 1.516 | 1.516 | 1.516 | 1.550 | . | 1.577 | 1.577 | 1.577 | 1.614 | . |
| 23 | 24 | 1.475 | 1.480 | 1.484 | 1.489 | 1.495 | 1.399 | 1.422 | 1.439 | 1.454 | 1.469 | 1.448 | 1.473 | 1.492 | 1.508 | 1.525 |
| 24 | 21 | 1.507 | 1.511 | 1.517 | 1.519 | 1.521 | 1.287 | 1.298 | 1.309 | 1.336 | 1.353 | 1.325 | 1.337 | 1.349 | 1.379 | 1.398 |
| 25 | 20 | 1.528 | 1.530 | 1.534 | 1.536 | 1.537 | 1.180 | 1.191 | 1.206 | 1.233 | 1.243 | 1.209 | 1.220 | 1.237 | 1.266 | 1.278 |
| 26 | 18 | 1.541 | 1.541 | 1.542 | 1.543 | 1.543 | 1.079 | 1.089 | 1.109 | 1.129 | 1.130 | 1.099 | 1.110 | 1.131 | 1.153 | 1.154 |
| 27 | 19 | 1.540 | 1.540 | 1.541 | 1.542 | 1.543 | 0.984 | 0.984 | 1.003 | 1.021 | 1.041 | 0.997 | 0.997 | 1.017 | 1.037 | 1.057 |
| 28 | 19 | 1.527 | 1.528 | 1.531 | 1.533 | 1.536 | 0.894 | 0.903 | 0.921 | 0.930 | 0.947 | 0.901 | 0.910 | 0.929 | 0.938 | 0.958 |
| 29 | 19 | 1.504 | 1.504 | 1.507 | 1.514 | 1.516 | 0.810 | 0.810 | 0.818 | 0.843 | 0.852 | 0.812 | 0.812 | 0.820 | 0.846 | 0.855 |
| 30 | 25 | 1.472 | 1.475 | 1.479 | 1.486 | 1.489 | 0.732 | 0.739 | 0.747 | 0.763 | 0.770 | 0.729 | 0.737 | 0.745 | 0.761 | 0.769 |
| 31 | 20 | 1.430 | 1.431 | 1.446 | 1.455 | 1.456 | 0.659 | 0.661 | 0.684 | 0.700 | 0.702 | 0.653 | 0.655 | 0.679 | 0.696 | 0.698 |
| 32 | 20 | 1.379 | 1.384 | 1.392 | 1.404 | 1.410 | 0.592 | 0.598 | 0.608 | 0.623 | 0.631 | 0.585 | 0.591 | 0.601 | 0.616 | 0.624 |
| 33 | 20 | 1.317 | 1.324 | 1.343 | 1.349 | 1.349 | 0.530 | 0.536 | 0.554 | 0.560 | 0.560 | 0.522 | 0.528 | 0.546 | 0.552 | 0.552 |
| 34 | 18 | 1.247 | 1.260 | 1.276 | 1.290 | 1.290 | 0.474 | 0.484 | 0.496 | 0.507 | 0.507 | 0.466 | 0.476 | 0.488 | 0.499 | 0.499 |
| 35 | 18 | 1.168 | 1.183 | 1.200 | 1.208 | 1.216 | 0.425 | 0.433 | 0.443 | 0.448 | 0.453 | 0.418 | 0.427 | 0.436 | 0.441 | 0.446 |
| 36 | 20 | 1.086 | 1.095 | 1.123 | 1.132 | 1.132 | 0.383 | 0.387 | 0.401 | 0.405 | 0.405 | 0.379 | 0.383 | 0.395 | 0.400 | 0.400 |
| 37 | 20 | 0.998 | 1.008 | 1.028 | 1.038 | 1.038 | 0.347 | 0.351 | 0.359 | 0.362 | 0.362 | 0.346 | 0.350 | 0.357 | 0.360 | 0.360 |
| 38 | 12 | 0.879 | 0.891 | 0.896 | 0.921 | 0.935 | 0.309 | 0.312 | 0.314 | 0.321 | 0.325 | 0.314 | 0.316 | 0.318 | 0.324 | 0.327 |

|  | | | | AL-SFW | | | | | AR-SFW | | | | | AL-UIL | | |
| --- | --- | --- | --- | --- | --- | --- | --- | --- | --- | --- | --- | --- | --- | --- | --- | --- |
| GA | N | C10 | C25 | C50 | C75 | C90 | C10 | C25 | C50 | C75 | C90 | C10 | C25 | C50 | C75 | C90 |
| 22 | 8 | 1.435 | 1.449 | 1.460 | 1.460 | . | 1.516 | 1.516 | 1.516 | 1.550 | . | 1.577 | 1.577 | 1.577 | 1.614 | . |
| 23 | 24 | 1.475 | 1.480 | 1.484 | 1.489 | 1.495 | 1.399 | 1.422 | 1.439 | 1.454 | 1.469 | 1.448 | 1.473 | 1.492 | 1.508 | 1.525 |
| 24 | 21 | 1.507 | 1.511 | 1.517 | 1.519 | 1.521 | 1.287 | 1.298 | 1.309 | 1.336 | 1.353 | 1.325 | 1.337 | 1.349 | 1.379 | 1.398 |
| 25 | 20 | 1.528 | 1.530 | 1.534 | 1.536 | 1.537 | 1.180 | 1.191 | 1.206 | 1.233 | 1.243 | 1.209 | 1.220 | 1.237 | 1.266 | 1.278 |
| 26 | 18 | 1.541 | 1.541 | 1.542 | 1.543 | 1.543 | 1.079 | 1.089 | 1.109 | 1.129 | 1.130 | 1.099 | 1.110 | 1.131 | 1.153 | 1.154 |
| 27 | 19 | 1.540 | 1.540 | 1.541 | 1.542 | 1.543 | 0.984 | 0.984 | 1.003 | 1.021 | 1.041 | 0.997 | 0.997 | 1.017 | 1.037 | 1.057 |
| 28 | 19 | 1.527 | 1.528 | 1.531 | 1.533 | 1.536 | 0.894 | 0.903 | 0.921 | 0.930 | 0.947 | 0.901 | 0.910 | 0.929 | 0.938 | 0.958 |
| 29 | 19 | 1.504 | 1.504 | 1.507 | 1.514 | 1.516 | 0.810 | 0.810 | 0.818 | 0.843 | 0.852 | 0.812 | 0.812 | 0.820 | 0.846 | 0.855 |
| 30 | 25 | 1.472 | 1.475 | 1.479 | 1.486 | 1.489 | 0.732 | 0.739 | 0.747 | 0.763 | 0.770 | 0.729 | 0.737 | 0.745 | 0.761 | 0.769 |
| 31 | 20 | 1.430 | 1.431 | 1.446 | 1.455 | 1.456 | 0.659 | 0.661 | 0.684 | 0.700 | 0.702 | 0.653 | 0.655 | 0.679 | 0.696 | 0.698 |
| 32 | 20 | 1.379 | 1.384 | 1.392 | 1.404 | 1.410 | 0.592 | 0.598 | 0.608 | 0.623 | 0.631 | 0.585 | 0.591 | 0.601 | 0.616 | 0.624 |
| 33 | 20 | 1.317 | 1.324 | 1.343 | 1.349 | 1.349 | 0.530 | 0.536 | 0.554 | 0.560 | 0.560 | 0.522 | 0.528 | 0.546 | 0.552 | 0.552 |
| 34 | 18 | 1.247 | 1.260 | 1.276 | 1.290 | 1.290 | 0.474 | 0.484 | 0.496 | 0.507 | 0.507 | 0.466 | 0.476 | 0.488 | 0.499 | 0.499 |
| 35 | 18 | 1.168 | 1.183 | 1.200 | 1.208 | 1.216 | 0.425 | 0.433 | 0.443 | 0.448 | 0.453 | 0.418 | 0.427 | 0.436 | 0.441 | 0.446 |
| 36 | 20 | 1.086 | 1.095 | 1.123 | 1.132 | 1.132 | 0.383 | 0.387 | 0.401 | 0.405 | 0.405 | 0.379 | 0.383 | 0.395 | 0.400 | 0.400 |
| 37 | 20 | 0.998 | 1.008 | 1.028 | 1.038 | 1.038 | 0.347 | 0.351 | 0.359 | 0.362 | 0.362 | 0.346 | 0.350 | 0.357 | 0.360 | 0.360 |
| 38 | 12 | 0.879 | 0.891 | 0.896 | 0.921 | 0.935 | 0.309 | 0.312 | 0.314 | 0.321 | 0.325 | 0.314 | 0.316 | 0.318 | 0.324 | 0.327 |

|  | | | | AL-SFD | | | | | AR-SFD | | | | | L-SFAD | | |
| --- | --- | --- | --- | --- | --- | --- | --- | --- | --- | --- | --- | --- | --- | --- | --- | --- |
| GA | N | C10 | C25 | C50 | C75 | C90 | C10 | C25 | C50 | C75 | C90 | C10 | C25 | C50 | C75 | C90 |
| 22 | 8 | 0.260 | 0.272 | 0.282 | 0.282 | . | 0.251 | 0.262 | 0.272 | 0.272 | . | 0.476 | 0.486 | 0.494 | 0.494 | . |
| 23 | 24 | 0.297 | 0.302 | 0.307 | 0.312 | 0.320 | 0.286 | 0.290 | 0.295 | 0.300 | 0.307 | 0.505 | 0.509 | 0.513 | 0.517 | 0.522 |
| 24 | 21 | 0.335 | 0.341 | 0.351 | 0.355 | 0.359 | 0.322 | 0.328 | 0.337 | 0.341 | 0.344 | 0.534 | 0.538 | 0.545 | 0.547 | 0.550 |
| 25 | 20 | 0.375 | 0.379 | 0.389 | 0.395 | 0.399 | 0.359 | 0.363 | 0.373 | 0.378 | 0.382 | 0.561 | 0.564 | 0.570 | 0.574 | 0.577 |
| 26 | 18 | 0.419 | 0.419 | 0.428 | 0.436 | 0.440 | 0.401 | 0.402 | 0.409 | 0.417 | 0.421 | 0.590 | 0.590 | 0.595 | 0.600 | 0.603 |
| 27 | 19 | 0.457 | 0.465 | 0.474 | 0.482 | 0.482 | 0.437 | 0.445 | 0.453 | 0.461 | 0.461 | 0.613 | 0.618 | 0.623 | 0.628 | 0.628 |
| 28 | 19 | 0.499 | 0.507 | 0.512 | 0.520 | 0.525 | 0.477 | 0.485 | 0.489 | 0.497 | 0.501 | 0.638 | 0.643 | 0.645 | 0.650 | 0.652 |
| 29 | 19 | 0.546 | 0.550 | 0.563 | 0.568 | 0.568 | 0.521 | 0.525 | 0.537 | 0.541 | 0.541 | 0.664 | 0.667 | 0.674 | 0.676 | 0.676 |
| 30 | 25 | 0.589 | 0.594 | 0.602 | 0.607 | 0.611 | 0.561 | 0.566 | 0.574 | 0.578 | 0.582 | 0.687 | 0.690 | 0.694 | 0.696 | 0.699 |
| 31 | 20 | 0.628 | 0.629 | 0.639 | 0.654 | 0.655 | 0.598 | 0.599 | 0.609 | 0.622 | 0.623 | 0.707 | 0.708 | 0.713 | 0.720 | 0.721 |
| 32 | 20 | 0.673 | 0.678 | 0.687 | 0.694 | 0.698 | 0.640 | 0.644 | 0.654 | 0.660 | 0.664 | 0.729 | 0.732 | 0.737 | 0.740 | 0.742 |
| 33 | 20 | 0.720 | 0.720 | 0.725 | 0.738 | 0.742 | 0.685 | 0.685 | 0.689 | 0.701 | 0.705 | 0.752 | 0.752 | 0.754 | 0.760 | 0.762 |
| 34 | 18 | 0.760 | 0.760 | 0.769 | 0.778 | 0.786 | 0.722 | 0.722 | 0.730 | 0.739 | 0.746 | 0.770 | 0.770 | 0.774 | 0.779 | 0.782 |
| 35 | 18 | 0.804 | 0.808 | 0.812 | 0.821 | 0.829 | 0.763 | 0.767 | 0.771 | 0.779 | 0.786 | 0.790 | 0.792 | 0.794 | 0.798 | 0.801 |
| 36 | 20 | 0.847 | 0.847 | 0.852 | 0.865 | 0.869 | 0.803 | 0.803 | 0.808 | 0.820 | 0.824 | 0.809 | 0.809 | 0.811 | 0.817 | 0.818 |
| 37 | 20 | 0.891 | 0.891 | 0.895 | 0.904 | 0.908 | 0.844 | 0.844 | 0.848 | 0.856 | 0.860 | 0.828 | 0.828 | 0.829 | 0.833 | 0.835 |
| 38 | 12 | 0.934 | 0.940 | 0.949 | 0.951 | 0.956 | 0.885 | 0.890 | 0.899 | 0.901 | 0.905 | 0.845 | 0.848 | 0.852 | 0.852 | 0.854 |

|  | | | | R-SFAD | | | | | L-SFPD | | | | | R-SFPD | | |
| --- | --- | --- | --- | --- | --- | --- | --- | --- | --- | --- | --- | --- | --- | --- | --- | --- |
| GA | N | C10 | C25 | C50 | C75 | C90 | C10 | C25 | C50 | C75 | C90 | C10 | C25 | C50 | C75 | C90 |
| 22 | 8 | 0.441 | 0.451 | 0.460 | 0.460 | . | 0.280 | 0.300 | 0.317 | 0.317 | . | 0.270 | 0.288 | 0.305 | 0.305 | . |
| 23 | 24 | 0.473 | 0.478 | 0.482 | 0.486 | 0.493 | 0.343 | 0.351 | 0.360 | 0.370 | 0.384 | 0.329 | 0.337 | 0.345 | 0.355 | 0.368 |
| 24 | 21 | 0.506 | 0.511 | 0.518 | 0.522 | 0.525 | 0.412 | 0.423 | 0.442 | 0.450 | 0.457 | 0.396 | 0.406 | 0.424 | 0.431 | 0.438 |
| 25 | 20 | 0.537 | 0.541 | 0.548 | 0.553 | 0.556 | 0.489 | 0.497 | 0.517 | 0.530 | 0.538 | 0.468 | 0.476 | 0.495 | 0.507 | 0.515 |
| 26 | 18 | 0.571 | 0.571 | 0.578 | 0.584 | 0.587 | 0.580 | 0.581 | 0.598 | 0.616 | 0.625 | 0.554 | 0.555 | 0.572 | 0.588 | 0.597 |
| 27 | 19 | 0.599 | 0.605 | 0.611 | 0.616 | 0.616 | 0.662 | 0.680 | 0.699 | 0.718 | 0.718 | 0.631 | 0.649 | 0.667 | 0.685 | 0.685 |
| 28 | 19 | 0.628 | 0.634 | 0.637 | 0.643 | 0.646 | 0.757 | 0.777 | 0.787 | 0.807 | 0.817 | 0.722 | 0.740 | 0.750 | 0.769 | 0.778 |
| 29 | 19 | 0.660 | 0.663 | 0.671 | 0.674 | 0.674 | 0.869 | 0.880 | 0.911 | 0.922 | 0.922 | 0.827 | 0.837 | 0.867 | 0.877 | 0.877 |
| 30 | 25 | 0.688 | 0.691 | 0.696 | 0.699 | 0.702 | 0.976 | 0.987 | 1.010 | 1.021 | 1.032 | 0.928 | 0.939 | 0.960 | 0.970 | 0.981 |
| 31 | 20 | 0.712 | 0.713 | 0.719 | 0.728 | 0.728 | 1.078 | 1.080 | 1.106 | 1.144 | 1.147 | 1.023 | 1.026 | 1.050 | 1.086 | 1.089 |
| 32 | 20 | 0.739 | 0.742 | 0.748 | 0.752 | 0.754 | 1.195 | 1.209 | 1.236 | 1.254 | 1.265 | 1.134 | 1.147 | 1.172 | 1.189 | 1.200 |
| 33 | 20 | 0.768 | 0.768 | 0.770 | 0.778 | 0.780 | 1.328 | 1.328 | 1.340 | 1.378 | 1.390 | 1.258 | 1.258 | 1.270 | 1.305 | 1.317 |
| 34 | 18 | 0.790 | 0.790 | 0.795 | 0.801 | 0.805 | 1.441 | 1.441 | 1.466 | 1.495 | 1.518 | 1.364 | 1.364 | 1.388 | 1.415 | 1.436 |
| 35 | 18 | 0.815 | 0.817 | 0.820 | 0.824 | 0.829 | 1.570 | 1.583 | 1.596 | 1.622 | 1.646 | 1.485 | 1.497 | 1.510 | 1.534 | 1.557 |
| 36 | 20 | 0.839 | 0.839 | 0.841 | 0.848 | 0.850 | 1.702 | 1.702 | 1.716 | 1.756 | 1.770 | 1.609 | 1.609 | 1.622 | 1.659 | 1.672 |
| 37 | 20 | 0.862 | 0.862 | 0.864 | 0.869 | 0.871 | 1.838 | 1.838 | 1.852 | 1.879 | 1.893 | 1.736 | 1.736 | 1.749 | 1.774 | 1.787 |
| 38 | 12 | 0.885 | 0.887 | 0.892 | 0.893 | 0.896 | 1.976 | 1.994 | 2.025 | 2.032 | 2.046 | 1.865 | 1.881 | 1.911 | 1.918 | 1.931 |

|  |  | CL-SFW | | | | | CR-SFW | | | | | CL-UIL | | | | |
| --- | --- | --- | --- | --- | --- | --- | --- | --- | --- | --- | --- | --- | --- | --- | --- | --- |
| GA | N | C10 | C25 | C50 | C75 | C90 | C10 | C25 | C50 | C75 | C90 | C10 | C25 | C50 | C75 | C90 |
| 22 | 8 | 0.524 | 0.541 | 0.555 | 0.555 | . | 0.564 | 0.574 | 0.583 | 0.583 | . | 0.61 | 0.67 | 0.79 | 0.92 | . |
| 23 | 24 | 0.576 | 0.583 | 0.590 | 0.598 | 0.610 | 0.596 | 0.601 | 0.606 | 0.612 | 0.620 | 0.920 | 0.920 | 0.920 | 0.938 | . |
| 24 | 21 | 0.634 | 0.643 | 0.658 | 0.664 | 0.671 | 0.637 | 0.643 | 0.655 | 0.660 | 0.665 | 0.853 | 0.866 | 0.876 | 0.884 | 0.893 |
| 25 | 20 | 0.696 | 0.703 | 0.720 | 0.730 | 0.737 | 0.685 | 0.690 | 0.703 | 0.712 | 0.717 | 0.789 | 0.795 | 0.801 | 0.817 | 0.827 |
| 26 | 18 | 0.771 | 0.772 | 0.786 | 0.801 | 0.808 | 0.746 | 0.747 | 0.759 | 0.771 | 0.778 | 0.726 | 0.732 | 0.742 | 0.757 | 0.763 |
| 27 | 19 | 0.838 | 0.853 | 0.869 | 0.885 | 0.885 | 0.804 | 0.818 | 0.832 | 0.846 | 0.846 | 0.666 | 0.672 | 0.684 | 0.696 | 0.696 |
| 28 | 19 | 0.917 | 0.934 | 0.942 | 0.959 | 0.967 | 0.875 | 0.890 | 0.898 | 0.914 | 0.922 | 0.608 | 0.608 | 0.619 | 0.631 | 0.642 |
| 29 | 19 | 1.010 | 1.019 | 1.046 | 1.055 | 1.055 | 0.963 | 0.971 | 0.997 | 1.005 | 1.005 | 0.551 | 0.557 | 0.568 | 0.574 | 0.585 |
| 30 | 25 | 1.101 | 1.110 | 1.129 | 1.138 | 1.148 | 1.050 | 1.059 | 1.078 | 1.087 | 1.097 | 0.497 | 0.497 | 0.503 | 0.519 | 0.524 |
| 31 | 20 | 1.187 | 1.189 | 1.212 | 1.244 | 1.247 | 1.135 | 1.138 | 1.160 | 1.193 | 1.196 | 0.445 | 0.451 | 0.456 | 0.466 | 0.471 |
| 32 | 20 | 1.289 | 1.301 | 1.324 | 1.340 | 1.350 | 1.239 | 1.251 | 1.275 | 1.292 | 1.302 | 0.396 | 0.397 | 0.413 | 0.424 | 0.425 |
| 33 | 20 | 1.405 | 1.405 | 1.416 | 1.449 | 1.460 | 1.359 | 1.359 | 1.371 | 1.405 | 1.417 | 0.348 | 0.353 | 0.360 | 0.370 | 0.376 |
| 34 | 18 | 1.505 | 1.505 | 1.528 | 1.555 | 1.575 | 1.465 | 1.465 | 1.490 | 1.518 | 1.540 | 0.302 | 0.307 | 0.320 | 0.325 | 0.325 |
| 35 | 18 | 1.622 | 1.635 | 1.647 | 1.671 | 1.693 | 1.591 | 1.604 | 1.617 | 1.643 | 1.667 | 0.259 | 0.266 | 0.276 | 0.285 | 0.285 |
| 36 | 20 | 1.745 | 1.745 | 1.758 | 1.796 | 1.808 | 1.724 | 1.724 | 1.738 | 1.779 | 1.793 | 0.218 | 0.225 | 0.234 | 0.238 | 0.242 |
| 37 | 20 | 1.873 | 1.873 | 1.886 | 1.912 | 1.926 | 1.865 | 1.865 | 1.879 | 1.909 | 1.923 | 0.182 | 0.186 | 0.197 | 0.201 | 0.201 |
| 38 | 12 | 2.006 | 2.023 | 2.054 | 2.061 | 2.075 | 2.013 | 2.033 | 2.067 | 2.075 | 2.091 | 0.148 | 0.152 | 0.159 | 0.163 | 0.163 |

|  |  | CR-UIL | | | | | CL-UIR | | | | | CR-UIR | | | | |
| --- | --- | --- | --- | --- | --- | --- | --- | --- | --- | --- | --- | --- | --- | --- | --- | --- |
| GA | N | C10 | C25 | C50 | C75 | C90 | C10 | C25 | C50 | C75 | C90 | C10 | C25 | C50 | C75 | C90 |
| 22 | 8 | 0.915 | 0.915 | 0.915 | 0.933 | . | 1.651 | 1.651 | 1.651 | 1.716 | . | 1.665 | 1.665 | 1.665 | 1.726 | . |
| 23 | 24 | 0.849 | 0.862 | 0.872 | 0.880 | 0.889 | 1.426 | 1.470 | 1.503 | 1.531 | 1.559 | 1.452 | 1.493 | 1.525 | 1.551 | 1.578 |
| 24 | 21 | 0.786 | 0.792 | 0.799 | 0.814 | 0.824 | 1.219 | 1.239 | 1.259 | 1.310 | 1.341 | 1.255 | 1.274 | 1.294 | 1.342 | 1.372 |
| 25 | 20 | 0.725 | 0.731 | 0.740 | 0.755 | 0.761 | 1.029 | 1.048 | 1.075 | 1.122 | 1.141 | 1.075 | 1.092 | 1.118 | 1.163 | 1.181 |
| 26 | 18 | 0.666 | 0.672 | 0.683 | 0.695 | 0.696 | 0.858 | 0.874 | 0.907 | 0.941 | 0.943 | 0.910 | 0.925 | 0.958 | 0.990 | 0.992 |
| 27 | 19 | 0.609 | 0.609 | 0.620 | 0.631 | 0.643 | 0.704 | 0.704 | 0.733 | 0.763 | 0.794 | 0.761 | 0.761 | 0.789 | 0.818 | 0.848 |
| 28 | 19 | 0.554 | 0.559 | 0.570 | 0.576 | 0.587 | 0.568 | 0.580 | 0.607 | 0.620 | 0.647 | 0.627 | 0.640 | 0.666 | 0.679 | 0.705 |
| 29 | 19 | 0.501 | 0.501 | 0.506 | 0.522 | 0.527 | 0.449 | 0.449 | 0.460 | 0.495 | 0.506 | 0.510 | 0.510 | 0.521 | 0.555 | 0.567 |
| 30 | 25 | 0.451 | 0.456 | 0.461 | 0.471 | 0.476 | 0.349 | 0.358 | 0.367 | 0.387 | 0.397 | 0.409 | 0.418 | 0.428 | 0.447 | 0.457 |
| 31 | 20 | 0.402 | 0.403 | 0.419 | 0.430 | 0.431 | 0.266 | 0.268 | 0.293 | 0.311 | 0.313 | 0.323 | 0.325 | 0.351 | 0.370 | 0.372 |
| 32 | 20 | 0.356 | 0.360 | 0.367 | 0.378 | 0.383 | 0.201 | 0.207 | 0.215 | 0.230 | 0.237 | 0.254 | 0.260 | 0.269 | 0.284 | 0.293 |
| 33 | 20 | 0.312 | 0.316 | 0.329 | 0.333 | 0.333 | 0.154 | 0.158 | 0.170 | 0.175 | 0.175 | 0.199 | 0.204 | 0.219 | 0.224 | 0.224 |
| 34 | 18 | 0.270 | 0.277 | 0.286 | 0.295 | 0.295 | 0.124 | 0.128 | 0.134 | 0.140 | 0.140 | 0.162 | 0.167 | 0.175 | 0.182 | 0.182 |
| 35 | 18 | 0.230 | 0.237 | 0.245 | 0.249 | 0.253 | 0.113 | 0.113 | 0.115 | 0.116 | 0.117 | 0.140 | 0.143 | 0.146 | 0.148 | 0.151 |
| 36 | 20 | 0.195 | 0.199 | 0.210 | 0.214 | 0.214 | 0.113 | 0.113 | 0.113 | 0.116 | 0.117 | 0.133 | 0.133 | 0.134 | 0.135 | 0.135 |
| 37 | 20 | 0.163 | 0.167 | 0.174 | 0.177 | 0.177 | 0.126 | 0.126 | 0.128 | 0.133 | 0.136 | 0.135 | 0.135 | 0.136 | 0.138 | 0.140 |
| 38 | 12 | 0.126 | 0.129 | 0.131 | 0.138 | 0.142 | 0.157 | 0.162 | 0.172 | 0.174 | 0.179 | 0.151 | 0.154 | 0.161 | 0.162 | 0.165 |

|  |  | CL-SFD | | | | | CR-SFD | | | | | L-SFSD | | | | |
| --- | --- | --- | --- | --- | --- | --- | --- | --- | --- | --- | --- | --- | --- | --- | --- | --- |
| GA | N | C10 | C25 | C50 | C75 | C90 | C10 | C25 | C50 | C75 | C90 | C10 | C25 | C50 | C75 | C90 |
| 22 | 8 | 0.353 | 0.369 | 0.383 | 0.383 | . | 0.349 | 0.365 | 0.379 | 0.379 | . | 0.426 | 0.428 | 0.429 | 0.429 | . |
| 23 | 24 | 0.404 | 0.411 | 0.417 | 0.425 | 0.436 | 0.399 | 0.405 | 0.412 | 0.419 | 0.430 | 0.433 | 0.434 | 0.435 | 0.437 | 0.440 |
| 24 | 21 | 0.457 | 0.466 | 0.479 | 0.485 | 0.490 | 0.450 | 0.458 | 0.471 | 0.477 | 0.482 | 0.445 | 0.448 | 0.452 | 0.454 | 0.455 |
| 25 | 20 | 0.513 | 0.518 | 0.533 | 0.541 | 0.547 | 0.504 | 0.509 | 0.523 | 0.531 | 0.536 | 0.464 | 0.466 | 0.471 | 0.475 | 0.477 |
| 26 | 18 | 0.575 | 0.576 | 0.587 | 0.599 | 0.605 | 0.563 | 0.564 | 0.575 | 0.586 | 0.592 | 0.490 | 0.490 | 0.496 | 0.502 | 0.505 |
| 27 | 19 | 0.628 | 0.640 | 0.652 | 0.664 | 0.664 | 0.615 | 0.626 | 0.637 | 0.649 | 0.649 | 0.518 | 0.525 | 0.532 | 0.539 | 0.539 |
| 28 | 19 | 0.688 | 0.700 | 0.706 | 0.718 | 0.724 | 0.672 | 0.683 | 0.689 | 0.700 | 0.706 | 0.554 | 0.562 | 0.566 | 0.574 | 0.578 |
| 29 | 19 | 0.754 | 0.761 | 0.779 | 0.785 | 0.785 | 0.735 | 0.741 | 0.759 | 0.765 | 0.765 | 0.600 | 0.605 | 0.619 | 0.624 | 0.624 |
| 30 | 25 | 0.816 | 0.822 | 0.834 | 0.841 | 0.847 | 0.794 | 0.800 | 0.812 | 0.818 | 0.823 | 0.649 | 0.654 | 0.664 | 0.670 | 0.675 |
| 31 | 20 | 0.872 | 0.873 | 0.887 | 0.907 | 0.909 | 0.847 | 0.849 | 0.862 | 0.881 | 0.883 | 0.697 | 0.699 | 0.712 | 0.731 | 0.732 |
| 32 | 20 | 0.934 | 0.942 | 0.956 | 0.965 | 0.971 | 0.907 | 0.914 | 0.927 | 0.936 | 0.941 | 0.757 | 0.765 | 0.779 | 0.789 | 0.795 |
| 33 | 20 | 1.003 | 1.003 | 1.009 | 1.028 | 1.034 | 0.972 | 0.972 | 0.978 | 0.996 | 1.002 | 0.829 | 0.829 | 0.836 | 0.857 | 0.864 |
| 34 | 18 | 1.059 | 1.059 | 1.072 | 1.086 | 1.097 | 1.025 | 1.025 | 1.037 | 1.051 | 1.061 | 0.894 | 0.894 | 0.909 | 0.926 | 0.939 |
| 35 | 18 | 1.122 | 1.128 | 1.135 | 1.147 | 1.158 | 1.085 | 1.091 | 1.097 | 1.109 | 1.119 | 0.971 | 0.979 | 0.987 | 1.004 | 1.018 |
| 36 | 20 | 1.185 | 1.185 | 1.191 | 1.210 | 1.216 | 1.144 | 1.144 | 1.150 | 1.168 | 1.174 | 1.054 | 1.054 | 1.063 | 1.089 | 1.098 |
| 37 | 20 | 1.247 | 1.247 | 1.253 | 1.266 | 1.272 | 1.204 | 1.204 | 1.209 | 1.221 | 1.227 | 1.143 | 1.143 | 1.152 | 1.171 | 1.180 |
| 38 | 12 | 1.309 | 1.317 | 1.331 | 1.334 | 1.340 | 1.262 | 1.270 | 1.283 | 1.286 | 1.292 | 1.238 | 1.250 | 1.273 | 1.278 | 1.288 |

|  |  | R-SFSD | | | | | L-SFID | | | | | R-SFID | | | | |
| --- | --- | --- | --- | --- | --- | --- | --- | --- | --- | --- | --- | --- | --- | --- | --- | --- |
| GA | N | C10 | C25 | C50 | C75 | C90 | C10 | C25 | C50 | C75 | C90 | C10 | C25 | C50 | C75 | C90 |
| 22 | 8 | 0.433 | 0.433 | 0.433 | 0.433 | . | 0.270 | 0.284 | 0.297 | 0.297 | . | 0.271 | 0.286 | 0.298 | 0.298 | . |
| 23 | 24 | 0.434 | 0.435 | 0.436 | 0.437 | 0.438 | 0.316 | 0.322 | 0.329 | 0.336 | 0.346 | 0.317 | 0.323 | 0.329 | 0.336 | 0.345 |
| 24 | 21 | 0.443 | 0.444 | 0.448 | 0.449 | 0.451 | 0.366 | 0.374 | 0.387 | 0.392 | 0.398 | 0.365 | 0.373 | 0.385 | 0.390 | 0.395 |
| 25 | 20 | 0.458 | 0.460 | 0.465 | 0.468 | 0.471 | 0.419 | 0.424 | 0.438 | 0.446 | 0.452 | 0.416 | 0.421 | 0.434 | 0.442 | 0.448 |
| 26 | 18 | 0.483 | 0.483 | 0.489 | 0.494 | 0.497 | 0.480 | 0.480 | 0.492 | 0.503 | 0.509 | 0.474 | 0.475 | 0.486 | 0.497 | 0.502 |
| 27 | 19 | 0.510 | 0.517 | 0.524 | 0.531 | 0.531 | 0.532 | 0.544 | 0.556 | 0.568 | 0.568 | 0.525 | 0.536 | 0.547 | 0.559 | 0.559 |
| 28 | 19 | 0.547 | 0.555 | 0.560 | 0.568 | 0.573 | 0.593 | 0.605 | 0.611 | 0.623 | 0.630 | 0.582 | 0.594 | 0.600 | 0.611 | 0.617 |
| 29 | 19 | 0.596 | 0.601 | 0.616 | 0.621 | 0.621 | 0.661 | 0.667 | 0.686 | 0.693 | 0.693 | 0.647 | 0.653 | 0.671 | 0.677 | 0.677 |
| 30 | 25 | 0.648 | 0.654 | 0.665 | 0.671 | 0.677 | 0.725 | 0.731 | 0.744 | 0.751 | 0.757 | 0.708 | 0.714 | 0.726 | 0.732 | 0.738 |
| 31 | 20 | 0.701 | 0.703 | 0.717 | 0.738 | 0.740 | 0.784 | 0.785 | 0.800 | 0.822 | 0.823 | 0.763 | 0.765 | 0.779 | 0.799 | 0.801 |
| 32 | 20 | 0.767 | 0.775 | 0.791 | 0.802 | 0.809 | 0.851 | 0.859 | 0.874 | 0.884 | 0.890 | 0.826 | 0.834 | 0.848 | 0.857 | 0.863 |
| 33 | 20 | 0.847 | 0.847 | 0.855 | 0.879 | 0.887 | 0.925 | 0.925 | 0.932 | 0.952 | 0.959 | 0.896 | 0.896 | 0.902 | 0.921 | 0.928 |
| 34 | 18 | 0.920 | 0.920 | 0.937 | 0.956 | 0.971 | 0.986 | 0.986 | 1.000 | 1.016 | 1.028 | 0.954 | 0.954 | 0.967 | 0.981 | 0.993 |
| 35 | 18 | 1.007 | 1.016 | 1.025 | 1.044 | 1.061 | 1.056 | 1.063 | 1.070 | 1.084 | 1.096 | 1.019 | 1.025 | 1.032 | 1.045 | 1.056 |
| 36 | 20 | 1.102 | 1.102 | 1.111 | 1.141 | 1.152 | 1.126 | 1.126 | 1.133 | 1.154 | 1.161 | 1.084 | 1.084 | 1.091 | 1.110 | 1.117 |
| 37 | 20 | 1.203 | 1.203 | 1.214 | 1.235 | 1.246 | 1.196 | 1.196 | 1.203 | 1.217 | 1.225 | 1.150 | 1.150 | 1.156 | 1.169 | 1.176 |
| 38 | 12 | 1.312 | 1.326 | 1.352 | 1.358 | 1.369 | 1.267 | 1.276 | 1.292 | 1.295 | 1.303 | 1.216 | 1.224 | 1.239 | 1.242 | 1.249 |
